# Supplementary material for: Dietary Acid Load and Mental Health Outcomes in Children and Adolescents: Results from the GINIplus and LISA Birth Cohort Studies
Source: PubMed Central journal article supplement (PMC5986462; doi:10.3390/nu10050582), 2018-05-08
Supplement: nutrients-10-00582-s001.pdf [file nutrients-10-00582-s001.pdf]

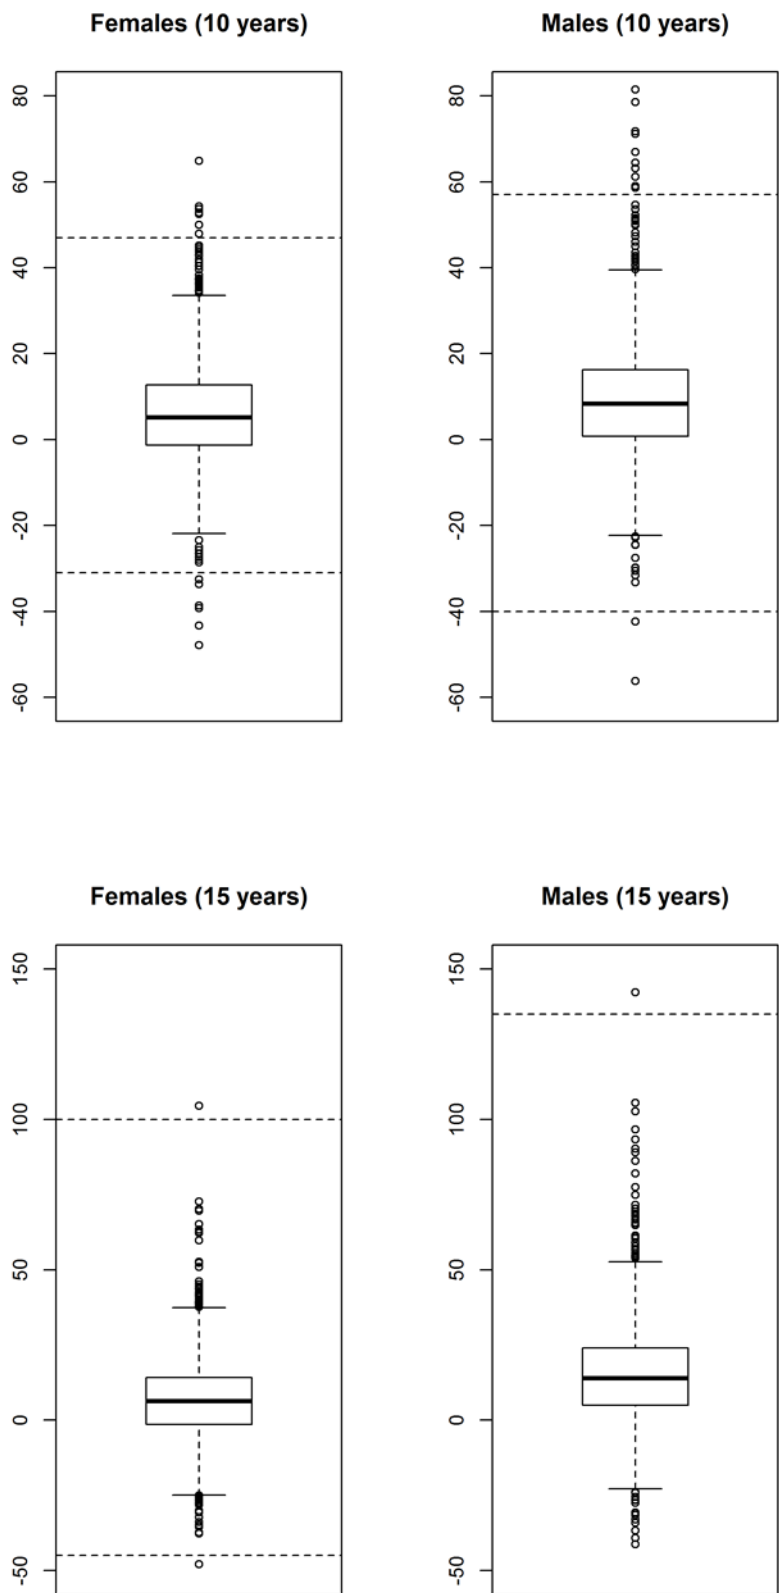

**Figure S1.** Distribution of PRAL in females (left) and males (right), at the 10- and 15-year follow-ups. The dotted lines indicate extreme values which were subsequently excluded from analyses

**Table S1. OR and 95% CI assessing the cross-sectional and prospective associations of diet-induced acid load (PRAL) with mental health outcomes, additionally adjusting for parental psychopathology<sup>a</sup>**

|                                           | Cross-sectional <sup>b</sup><br>(10-year Follow-up; N=2149) |                  | Cross-sectional <sup>b</sup><br>(15-year Follow-up; N=2046) |         | Prospective <sup>c</sup><br>(10- to 15-year Follow-up; N=1674) |         |
|-------------------------------------------|-------------------------------------------------------------|------------------|-------------------------------------------------------------|---------|----------------------------------------------------------------|---------|
|                                           | OR (95%CI)                                                  | P-value          | OR (95%CI)                                                  | P-value | OR (95%CI)                                                     | P-value |
| <b>(A) Borderline/abnormal vs. normal</b> |                                                             |                  |                                                             |         |                                                                |         |
| Total difficulties                        | 1.22 (1.03;1.43)                                            | <b>0.020</b>     | 1.05 (0.83;1.32)                                            | 0.691   | 0.93 (0.72;1.20)                                               | 0.590   |
| Emotional problems                        | 1.35 (1.16;1.58)                                            | <b>&lt;0.001</b> | 1.06 (0.82;1.36)                                            | 0.662   | 1.04 (0.78;1.37)                                               | 0.807   |
| Conduct problems                          | 1.01 (0.85;1.20)                                            | 0.897            | 1.13 (0.91;1.40)                                            | 0.266   | 0.92 (0.72;1.18)                                               | 0.516   |
| Hyperactivity                             | 1.33 (1.12;1.58)                                            | <b>0.001</b>     | 1.11 (0.94;1.31)                                            | 0.204   | 1.13 (0.94;1.36)                                               | 0.199   |
| Peer problems                             | 1.20 (0.98;1.46)                                            | 0.082            | 1.02 (0.85;1.22)                                            | 0.839   | 1.12 (0.92;1.35)                                               | 0.254   |
| Prosocial                                 | 1.12 (0.90;1.40)                                            | 0.296            | 1.01 (0.82;1.24)                                            | 0.949   | 0.87 (0.68;1.10)                                               | 0.247   |
| <b>(B) Abnormal vs. normal/borderline</b> |                                                             |                  |                                                             |         |                                                                |         |
| Total difficulties                        | 1.39 (1.11;1.72)                                            | <b>0.003</b>     | 1.14 (0.68;1.91)                                            | 0.630   | 0.99 (0.47;2.06)                                               | 0.977   |
| Emotional problems                        | 1.28 (1.06;1.56)                                            | <b>0.012</b>     | 0.85 (0.60;1.20)                                            | 0.353   | 0.89 (0.62;1.28)                                               | 0.531   |
| Conduct problems                          | 1.09 (0.84;1.42)                                            | 0.507            | 1.07 (0.77;1.47)                                            | 0.702   | 0.99 (0.66;1.47)                                               | 0.945   |
| Hyperactivity                             | 1.43 (1.16;1.77)                                            | <b>0.001</b>     | 1.01 (0.80;1.27)                                            | 0.939   | 1.26 (0.97;1.64)                                               | 0.087   |
| Peer problems                             | 1.23 (0.93;1.62)                                            | 0.140            | 0.89 (0.57;1.37)                                            | 0.587   | 1.20 (0.78;1.83)                                               | 0.408   |
| Prosocial                                 | 1.06 (0.76;1.50)                                            | 0.721            | 0.97 (0.66;1.44)                                            | 0.895   | 0.88 (0.57;1.35)                                               | 0.552   |

<sup>a</sup>OR and 95%CI modelled per interquartile range increase in PRAL (10-year cross-sectional=14.8 mEq/d; 15-year cross-sectional=17.8 mEq/d; prospective=14.8 mEq/d);

<sup>b</sup>Logistic regression models adjusted for sex, total energy intake, sedentary behaviour, moderate-vigorous physical activity, BMI, pubertal status, parental education, study, recruitment region and parental psychopathology; <sup>c</sup>Logistic regression models further adjusted for the respective mental health subscale assessed at age 10 years

**Table S2. OR and 95% CI assessing the cross-sectional and prospective associations of diet-induced acid load (PRAL) with mental health outcomes, excluding participants with chronic diseases<sup>a</sup>**

|                                           | Cross-sectional <sup>b</sup><br>(10-year Follow-up; N=2332) |                  | Cross-sectional <sup>b</sup><br>(15-year Follow-up; N=2042) |         | Prospective <sup>c</sup><br>(10- to 15-year Follow-up; N=1669) |         |
|-------------------------------------------|-------------------------------------------------------------|------------------|-------------------------------------------------------------|---------|----------------------------------------------------------------|---------|
|                                           | OR (95%CI)                                                  | P-value          | OR (95%CI)                                                  | P-value | OR (95%CI)                                                     | P-value |
| <b>(A) Borderline/abnormal vs. normal</b> |                                                             |                  |                                                             |         |                                                                |         |
| Total difficulties                        | 1.13 (0.97;1.32)                                            | 0.128            | 0.98 (0.78;1.24)                                            | 0.891   | 0.91 (0.70;1.18)                                               | 0.468   |
| Emotional problems                        | 1.33 (1.15;1.54)                                            | <b>&lt;0.001</b> | 0.99 (0.77;1.27)                                            | 0.934   | 1.01 (0.76;1.34)                                               | 0.947   |
| Conduct problems                          | 0.98 (0.83;1.16)                                            | 0.833            | 1.11 (0.90;1.37)                                            | 0.330   | 0.91 (0.71;1.17)                                               | 0.458   |
| Hyperactivity                             | 1.23 (1.05;1.44)                                            | <b>0.011</b>     | 1.07 (0.91;1.26)                                            | 0.426   | 1.09 (0.90;1.31)                                               | 0.387   |
| Peer problems                             | 1.13 (0.94;1.37)                                            | 0.195            | 0.99 (0.83;1.19)                                            | 0.955   | 1.11 (0.92;1.34)                                               | 0.266   |
| Prosocial                                 | 1.10 (0.89;1.35)                                            | 0.375            | 1.00 (0.81;1.22)                                            | 0.981   | 0.88 (0.69;1.12)                                               | 0.287   |
| <b>(B) Abnormal vs. normal/borderline</b> |                                                             |                  |                                                             |         |                                                                |         |
| Total difficulties                        | 1.26 (1.03;1.54)                                            | <b>0.027</b>     | 1.13 (0.67;1.90)                                            | 0.648   | 1.03 (0.50;2.15)                                               | 0.932   |
| Emotional problems                        | 1.26 (1.05;1.52)                                            | <b>0.014</b>     | 0.82 (0.58;1.16)                                            | 0.259   | 0.88 (0.62;1.26)                                               | 0.488   |
| Conduct problems                          | 1.00 (0.78;1.28)                                            | 0.987            | 1.07 (0.78;1.46)                                            | 0.681   | 0.98 (0.66;1.46)                                               | 0.919   |
| Hyperactivity                             | 1.34 (1.10;1.63)                                            | <b>0.004</b>     | 0.97 (0.77;1.22)                                            | 0.815   | 1.22 (0.93;1.58)                                               | 0.146   |
| Peer problems                             | 1.09 (0.84;1.41)                                            | 0.510            | 0.88 (0.56;1.37)                                            | 0.564   | 1.21 (0.79;1.85)                                               | 0.388   |
| Prosocial                                 | 1.08 (0.78;1.50)                                            | 0.645            | 0.97 (0.66;1.43)                                            | 0.864   | 0.89 (0.57;1.38)                                               | 0.601   |

<sup>a</sup>OR and 95%CI modelled per interquartile range increase in PRAL (10-year cross-sectional=14.9 mEq/d; 15-year cross-sectional=17.6 mEq/d; prospective=14.8 mEq/d);

<sup>b</sup>Logistic regression models adjusted for sex, total energy intake, sedentary behaviour, moderate-vigorous physical activity, BMI, pubertal status, parental education, study, and recruitment region; <sup>c</sup>Logistic regression models further adjusted for the respective mental health subscale assessed at age 10 years

**Table S3. OR and 95% CI assessing the cross-sectional and prospective associations of diet-induced acid load (PRAL) with mental health outcomes, additionally adjusting for n-3 PUFA**

|                                           | Cross-sectional <sup>b</sup><br>(10-year Follow-up; N=2350) |                  | Cross-sectional <sup>b</sup><br>(15-year Follow-up; N=2061) |         | Prospective <sup>c</sup><br>(10- to 15-year Follow-up; N=1685) |         |
|-------------------------------------------|-------------------------------------------------------------|------------------|-------------------------------------------------------------|---------|----------------------------------------------------------------|---------|
|                                           | OR (95%CI)                                                  | P-value          | OR (95%CI)                                                  | P-value | OR (95%CI)                                                     | P-value |
| <b>(A) Borderline/abnormal vs. normal</b> |                                                             |                  |                                                             |         |                                                                |         |
| Total difficulties                        | 1.11 (0.95;1.30)                                            | 0.184            | 1.01 (0.80;1.27)                                            | 0.929   | 0.93 (0.72;1.20)                                               | 0.566   |
| Emotional problems                        | 1.31 (1.14;1.52)                                            | <b>&lt;0.001</b> | 1.02 (0.80;1.31)                                            | 0.864   | 1.02 (0.77;1.34)                                               | 0.900   |
| Conduct problems                          | 0.98 (0.83;1.16)                                            | 0.808            | 1.12 (0.91;1.39)                                            | 0.280   | 0.92 (0.72;1.18)                                               | 0.529   |
| Hyperactivity                             | 1.20 (1.02;1.41)                                            | <b>0.026</b>     | 1.09 (0.93;1.29)                                            | 0.282   | 1.12 (0.93;1.35)                                               | 0.223   |
| Peer problems                             | 1.12 (0.93;1.36)                                            | 0.237            | 1.02 (0.85;1.22)                                            | 0.843   | 1.12 (0.93;1.35)                                               | 0.224   |
| Prosocial                                 | 1.15 (0.93;1.41)                                            | 0.200            | 1.01 (0.83;1.24)                                            | 0.890   | 0.87 (0.68;1.10)                                               | 0.248   |
| <b>(B) Abnormal vs. normal/borderline</b> |                                                             |                  |                                                             |         |                                                                |         |
| Total difficulties                        | 1.22 (1.00;1.49)                                            | 0.051            | 1.08 (0.64;1.81)                                            | 0.769   | 1.04 (0.50;2.15)                                               | 0.921   |
| Emotional problems                        | 1.25 (1.04;1.50)                                            | <b>0.019</b>     | 0.81 (0.58;1.14)                                            | 0.234   | 0.88 (0.62;1.25)                                               | 0.485   |
| Conduct problems                          | 1.00 (0.78;1.29)                                            | 0.986            | 1.08 (0.78;1.48)                                            | 0.647   | 0.98 (0.66;1.45)                                               | 0.908   |
| Hyperactivity                             | 1.30 (1.07;1.58)                                            | <b>0.008</b>     | 0.98 (0.78;1.23)                                            | 0.867   | 1.24 (0.95;1.61)                                               | 0.111   |
| Peer problems                             | 1.08 (0.84;1.40)                                            | 0.552            | 0.87 (0.56;1.34)                                            | 0.515   | 1.20 (0.79;1.84)                                               | 0.394   |
| Prosocial                                 | 1.09 (0.78;1.52)                                            | 0.608            | 0.98 (0.66;1.46)                                            | 0.923   | 0.88 (0.57;1.36)                                               | 0.571   |

<sup>a</sup>OR and 95%CI modelled per interquartile range increase in PRAL (10-year cross-sectional=14.9 mEq/d; 15-year cross-sectional=17.8 mEq/d; prospective=14.7 mEq/d);

<sup>b</sup>Logistic regression models adjusting for sex, total energy intake, sedentary behaviour, moderate-vigorous physical activity, BMI, pubertal status, parental education, study, recruitment region, and n-3 PUFA; <sup>c</sup>Logistic regression models further adjusting for the respective mental health subscale assessed at age 10 years

**Table S4. OR and 95% CI assessing the cross-sectional and prospective associations of diet-induced acid load (PRAL) with mental health outcomes, including only participants with complete data at both 10- and 15-year follow-ups<sup>a</sup>**

|                                           | Cross-sectional <sup>b</sup> |              | Cross-sectional <sup>b</sup> |              | Prospective <sup>c</sup>           |              |
|-------------------------------------------|------------------------------|--------------|------------------------------|--------------|------------------------------------|--------------|
|                                           | (10-year Follow-up; N=1146)  | P-value      | (15-year Follow-up; N=1146)  | P-value      | (10- to 15-year Follow-up; N=1146) | P-value      |
| <b>(A) Borderline/abnormal vs. normal</b> | OR (95%CI)                   | P-value      | OR (95%CI)                   | P-value      | OR (95%CI)                         | P-value      |
| Total difficulties                        | 1.06 (0.85;1.32)             | 0.632        | 1.12 (0.81;1.56)             | 0.482        | 0.88 (0.61;1.26)                   | 0.474        |
| Emotional problems                        | 1.39 (1.12;1.71)             | <b>0.003</b> | 1.06 (0.74;1.51)             | 0.768        | 0.91 (0.63;1.31)                   | 0.595        |
| Conduct problems                          | 1.01 (0.80;1.28)             | 0.904        | 0.84 (0.62;1.13)             | 0.250        | 0.79 (0.57;1.08)                   | 0.141        |
| Hyperactivity                             | 1.19 (0.93;1.50)             | 0.163        | 1.06 (0.85;1.32)             | 0.615        | 1.20 (0.93;1.55)                   | 0.169        |
| Peer problems                             | 1.13 (0.86;1.49)             | 0.376        | 1.06 (0.84;1.33)             | 0.613        | 1.13 (0.88;1.46)                   | 0.327        |
| Prosocial                                 | 1.04 (0.77;1.39)             | 0.811        | 1.07 (0.79;1.45)             | 0.654        | 0.85 (0.62;1.18)                   | 0.331        |
| <b>(B) Abnormal vs. normal/borderline</b> | OR (95%CI)                   | P-value      | OR (95%CI)                   | P-value      | OR (95%CI)                         | P-value      |
| Total difficulties                        | 1.06 (0.79;1.42)             | 0.700        | 2.35 (1.03;5.37)             | <b>0.042</b> | 1.88 (0.55;6.40)                   | 0.310        |
| Emotional problems                        | 1.22 (0.94;1.59)             | 0.137        | 0.91 (0.58;1.41)             | 0.668        | 0.79 (0.50;1.24)                   | 0.311        |
| Conduct problems                          | 1.14 (0.80;1.62)             | 0.475        | 0.82 (0.51;1.33)             | 0.419        | 0.91 (0.56;1.50)                   | 0.722        |
| Hyperactivity                             | 1.27 (0.95;1.70)             | 0.108        | 1.01 (0.73;1.41)             | 0.936        | 1.64 (1.12;2.39)                   | <b>0.011</b> |
| Peer problems                             | 1.19 (0.81;1.73)             | 0.377        | 0.74 (0.40;1.35)             | 0.320        | 0.95 (0.48;1.87)                   | 0.873        |
| Prosocial                                 | 0.93 (0.58;1.48)             | 0.747        | 1.02 (0.62;1.68)             | 0.938        | 1.03 (0.60;1.76)                   | 0.927        |

<sup>a</sup>OR and 95%CI modelled per interquartile range increase in PRAL (10-year cross-sectional and prospective=14.2 mEq/d; 15-year cross-sectional=16.8 mEq/d); <sup>b</sup>Logistic regression models adjusting for sex, total energy intake, sedentary behaviour, moderate-vigorous physical activity, BMI, pubertal status, parental education, study, and recruitment region; <sup>c</sup>Logistic regression models further adjusting for the respective mental health subscale assessed at age 10 years

**Table S5. OR and 95% CI assessing the cross-sectional and prospective associations of diet-induced acid load (PRAL) with mental health outcomes defined using Lohbeck et al. cut-offs for German adolescents<sup>a</sup>**

| 1. Including maximal available data at 10 and 15 years  | Cross-sectional <sup>b</sup> |         | Prospective <sup>c</sup>           |              |
|---------------------------------------------------------|------------------------------|---------|------------------------------------|--------------|
|                                                         | (15-year Follow-up; N=2061)  | P-value | (10- to 15-year Follow-up; N=1685) | P-value      |
| <b>(A) Borderline/abnormal vs. normal</b>               | OR (95%CI)                   | P-value | OR (95%CI)                         | P-value      |
| Total difficulties                                      | 1.01 (0.83;1.23)             | 0.909   | 1.05 (0.85;1.30)                   | 0.665        |
| Emotional problems                                      | 0.95 (0.81;1.12)             | 0.545   | 0.96 (0.80;1.14)                   | 0.620        |
| Conduct problems                                        | 1.04 (0.90;1.19)             | 0.597   | 0.95 (0.82;1.11)                   | 0.535        |
| Hyperactivity                                           | 1.08 (0.95;1.22)             | 0.250   | 1.00 (0.87;1.16)                   | 0.970        |
| Peer problems                                           | 1.02 (0.85;1.22)             | 0.851   | 1.12 (0.93;1.35)                   | 0.224        |
| Prosocial                                               | 1.04 (0.87;1.24)             | 0.674   | 0.91 (0.74;1.12)                   | 0.357        |
| <b>(B) Abnormal vs. normal/borderline</b>               | OR (95%CI)                   | P-value | OR (95%CI)                         | P-value      |
| Total difficulties                                      | 1.05 (0.74;1.48)             | 0.798   | 1.00 (0.68;1.48)                   | 0.996        |
| Emotional problems                                      | 0.92 (0.68;1.24)             | 0.579   | 0.93 (0.66;1.31)                   | 0.690        |
| Conduct problems                                        | 1.06 (0.81;1.37)             | 0.678   | 1.01 (0.76;1.36)                   | 0.929        |
| Hyperactivity                                           | 0.98 (0.78;1.23)             | 0.885   | 1.24 (0.95;1.61)                   | 0.111        |
| Peer problems                                           | 0.94 (0.66;1.33)             | 0.732   | 1.17 (0.82;1.65)                   | 0.384        |
| Prosocial                                               | 1.05 (0.78;1.42)             | 0.745   | 0.84 (0.59;1.20)                   | 0.338        |
| 2. Only including complete data at both 10 and 15 years | Cross-sectional <sup>b</sup> |         | Prospective <sup>c</sup>           |              |
|                                                         | (15-year Follow-up; N=1146)  | P-value | (10- to 15-year Follow-up; N=1146) | P-value      |
| <b>(A) Borderline/abnormal vs. normal</b>               | OR (95%CI)                   | P-value | OR (95%CI)                         | P-value      |
| Total difficulties                                      | 1.08 (0.82;1.42)             | 0.600   | 0.99 (0.73;1.34)                   | 0.961        |
| Emotional problems                                      | 0.91 (0.72;1.15)             | 0.409   | 0.87 (0.69;1.11)                   | 0.258        |
| Conduct problems                                        | 0.99 (0.82;1.19)             | 0.893   | 0.90 (0.74;1.10)                   | 0.299        |
| Hyperactivity                                           | 1.12 (0.94;1.33)             | 0.212   | 0.99 (0.82;1.19)                   | 0.918        |
| Peer problems                                           | 1.06 (0.84;1.33)             | 0.613   | 1.13 (0.88;1.46)                   | 0.327        |
| Prosocial                                               | 1.11 (0.85;1.45)             | 0.437   | 0.81 (0.61;1.08)                   | 0.148        |
| <b>(B) Abnormal vs. normal/borderline</b>               | OR (95%CI)                   | P-value | OR (95%CI)                         | P-value      |
| Total difficulties                                      | 1.35 (0.84;2.16)             | 0.218   | 0.98 (0.55;1.74)                   | 0.945        |
| Emotional problems                                      | 0.91 (0.59;1.40)             | 0.667   | 0.87 (0.56;1.35)                   | 0.529        |
| Conduct problems                                        | 0.79 (0.54;1.16)             | 0.236   | 0.82 (0.56;1.20)                   | 0.302        |
| Hyperactivity                                           | 1.01 (0.73;1.41)             | 0.936   | 1.64 (1.12;2.39)                   | <b>0.011</b> |
| Peer problems                                           | 0.94 (0.60;1.48)             | 0.781   | 1.09 (0.64;1.86)                   | 0.747        |
| Prosocial                                               | 1.12 (0.74;1.69)             | 0.590   | 0.98 (0.62;1.54)                   | 0.920        |

<sup>a</sup>OR and 95%CI modelled per IQR increase in PRAL (1. Including maximal data available: 15-year cross-sectional=17.8 mEq/d; prospective =14.7 mEq/d. 2. Including complete data: 15-year cross-sectional=16.8 mEq/d; prospective =14.2 mEq/d.); <sup>b</sup>Logistic regression models adjusted for sex, total energy intake, sedentary behaviour, moderate-vigorous physical activity, BMI, pubertal status, parental education, study, and recruitment region; <sup>c</sup>Logistic regression models further adjusted for the respective mental health subscale assessed at age 10 years

**Table S6. Descriptive characteristics of study population with complete data for SDQ and FFQ at the 10- and 15-year follow-ups**

|                                                              |                       | 10-year Follow-up     |                         |                       |                            | 15-year Follow-up  |                     |                    |                      |
|--------------------------------------------------------------|-----------------------|-----------------------|-------------------------|-----------------------|----------------------------|--------------------|---------------------|--------------------|----------------------|
|                                                              |                       | Total (N=1146)        | Females (N=589)         | Males (N=557)         | P-value <sup>a</sup>       | Total (N=1146)     | Females (N=589)     | Males (N=557)      | P-value <sup>a</sup> |
| <b>Total difficulties</b>                                    | [borderline]          | 75 (6.54)             | 26 (4.41)               | 49 (8.80)             | <b>0.002</b>               | 51 (4.45)          | 32 (5.43)           | 19 (3.41)          | 0.160                |
|                                                              | [abnormal]            | 79 (6.89)             | 34 (5.77)               | 45 (8.08)             |                            | 9 (0.79)           | 6 (1.02)            | 3 (0.54)           |                      |
| <b>Emotional problems</b>                                    | [borderline]          | 77 (6.72)             | 44 (7.47)               | 33 (5.92)             | 0.340                      | 24 (2.09)          | 22 (3.74)           | 2 (0.36)           | <b>&lt;0.001</b>     |
|                                                              | [abnormal]            | 106 (9.25)            | 49 (8.32)               | 57 (10.23)            |                            | 40 (3.49)          | 35 (5.94)           | 5 (0.90)           |                      |
| <b>Conduct problems</b>                                      | [borderline]          | 79 (6.89)             | 27 (4.58)               | 52 (9.34)             | <b>&lt;0.001</b>           | 44 (3.84)          | 19 (3.23)           | 25 (4.49)          | <b>0.001</b>         |
|                                                              | [abnormal]            | 50 (4.36)             | 18 (3.06)               | 32 (5.75)             |                            | 25 (2.18)          | 4 (0.68)            | 21 (3.77)          |                      |
| <b>Hyperactivity</b>                                         | [borderline]          | 48 (4.19)             | 19 (3.23)               | 29 (5.21)             | <b>&lt;0.001</b>           | 74 (6.46)          | 39 (6.62)           | 35 (6.28)          | 0.096                |
|                                                              | [abnormal]            | 84 (7.33)             | 24 (4.07)               | 60 (10.77)            |                            | 54 (4.71)          | 20 (3.40)           | 34 (6.10)          |                      |
| <b>Peer problems</b>                                         | [borderline]          | 44 (3.84)             | 24 (4.07)               | 20 (3.59)             | 0.370                      | 106 (9.25)         | 46 (7.81)           | 60 (10.77)         | 0.210                |
|                                                              | [abnormal]            | 50 (4.36)             | 21 (3.57)               | 29 (5.21)             |                            | 18 (1.57)          | 10 (1.70)           | 8 (1.44)           |                      |
| <b>Prosocial</b>                                             | [borderline]          | 57 (4.97)             | 20 (3.40)               | 37 (6.64)             | <b>0.005</b>               | 50 (4.36)          | 14 (2.38)           | 36 (6.46)          | <b>0.002</b>         |
|                                                              | [abnormal]            | 34 (2.97)             | 12 (2.04)               | 22 (3.95)             |                            | 27 (2.36)          | 11 (1.87)           | 16 (2.87)          |                      |
| <b>PRAL (mEg/d)</b>                                          |                       | 6.14 (-0.37; 13.87)   | 4.51 (-1.45; 11.68)     | 8.33 (0.80; 15.4)     | <b>&lt;0.001</b>           | 9.63 (1.68; 18.51) | 6.15 (-1.05; 13.64) | 13.9 (5.50; 23.30) | <b>&lt;0.001</b>     |
| <b>BMI (kg/m<sup>2</sup>)</b>                                |                       | 16.6 (15.5; 18.2)     | 16.6 (15.5; 18.2)       | 16.6 (15.5; 18.3)     | 0.543                      | 20 (18.6; 21.7)    | 20.1 (18.7; 21.7)   | 19.9 (18.5; 21.7)  | 0.151                |
| <b>Total energy intake (kcal/day)</b>                        |                       | 1892 (1573; 2255)     | 1780 (1487; 2107)       | 2066 (1673; 2405)     | <b>&lt;0.001</b>           | 1994 (1569; 2504)  | 1724 (1357; 2127)   | 2284 (1857; 2784)  | <b>&lt;0.001</b>     |
| <b>Moderate-vigorous PA</b>                                  | [low]                 | 252 (21.99)           | 158 (26.83)             | 94 (16.88)            | <b>&lt;0.001</b>           | 263 (22.95)        | 166 (28.18)         | 97 (17.41)         | <b>&lt;0.001</b>     |
|                                                              | [medium]              | 631 (55.06)           | 328 (55.69)             | 303 (54.40)           |                            | 621 (54.19)        | 324 (55.01)         | 297 (53.32)        |                      |
|                                                              | [high]                | 263 (22.95)           | 103 (17.49)             | 160 (28.73)           |                            | 262 (22.86)        | 99 (16.81)          | 163 (29.26)        |                      |
| <b>Screen-time [high]</b>                                    |                       | 103 (8.99)            | 46 (7.81)               | 57 (10.23)            | 0.180                      | 606 (52.88)        | 256 (43.46)         | 350 (62.84)        | <b>&lt;0.001</b>     |
| <b>Puberty signs [yes]</b>                                   |                       | 347 (30.28)           | 278 (47.20)             | 69 (12.39)            | <b>&lt;0.001</b>           | -                  | -                   | -                  |                      |
| <b>Pubertal stage</b>                                        | [pre-mid]             | -                     | -                       | -                     |                            | 265 (23.12)        | 28 (4.75)           | 237 (42.55)        | <b>&lt;0.001</b>     |
|                                                              | [late]                | -                     | -                       | -                     |                            | 784 (68.41)        | 468 (79.46)         | 316 (56.73)        |                      |
|                                                              | [post]                | -                     | -                       | -                     |                            | 97 (8.46)          | 93 (15.79)          | 4 (0.72)           |                      |
| <b>Basic covariates (same for 10- and 15-year follow-up)</b> |                       |                       |                         |                       |                            |                    |                     |                    |                      |
|                                                              |                       | <b>Total (N=2350)</b> | <b>Females (N=1137)</b> | <b>Males (N=1213)</b> | <b>P-value<sup>a</sup></b> |                    |                     |                    |                      |
| <b>Parental education [high]</b>                             |                       | 847 (73.91)           | 450 (76.40)             | 397 (71.27)           | 0.056                      |                    |                     |                    |                      |
| <b>Study (arm)</b>                                           | [GINI (observation)]  | 418 (36.47)           | 231 (39.22)             | 187 (33.57)           | <b>0.024</b>               |                    |                     |                    |                      |
|                                                              | [GINI (intervention)] | 304 (26.53)           | 162 (27.50)             | 142 (25.49)           |                            |                    |                     |                    |                      |
|                                                              | [LISA]                | 424 (37.00)           | 196 (33.28)             | 228 (40.93)           |                            |                    |                     |                    |                      |
| <b>Region</b>                                                | [Munich]              | 650 (56.72)           | 331 (56.20)             | 319 (57.27)           | 0.460                      |                    |                     |                    |                      |
|                                                              | [Leipzig]             | 80 (6.98)             | 37 (6.28)               | 43 (7.72)             |                            |                    |                     |                    |                      |
|                                                              | [Bad Honnef]          | 54 (4.71)             | 25 (4.24)               | 29 (5.21)             |                            |                    |                     |                    |                      |
|                                                              | [Wesel]               | 362 (31.59)           | 196 (33.28)             | 166 (29.80)           |                            |                    |                     |                    |                      |

Values are presented as counts (%) for categorical variables, and medians (25th; 75th percentile) for continuous variables.

<sup>a</sup>Comparison between males and females: tested by Wilcoxon's rank-sum test for continuous variables, and by Pearson's  $\chi^2$  test for categorical variables

Moderate-vigorous PA = Moderate-vigorous physical activity
